# Supplementary material for: Diverse structural assemblies and variable conductivities of silver-hexamethylenetetramine coordination polymers with 2-, 3-, and 4-sulfobenzoate ligands
Source: Royal Society of Chemistry journal article supplement (doi:10.1039/c000028k), 2010-01-01
Supplement: c000028k.pdf [file c000028k.pdf]

Sample: 09-3-26-1 N2  
Size: 7.9370 mg  
Method: custom

DSC-TGA

File: C:\TA\Data\SDT\zhulg\090925-1.001  
Operator: CHEN LINSHEN  
Run Date: 25-Sep-2009 06:44  
Instrument: SDT Q600 V8.2 Build 100

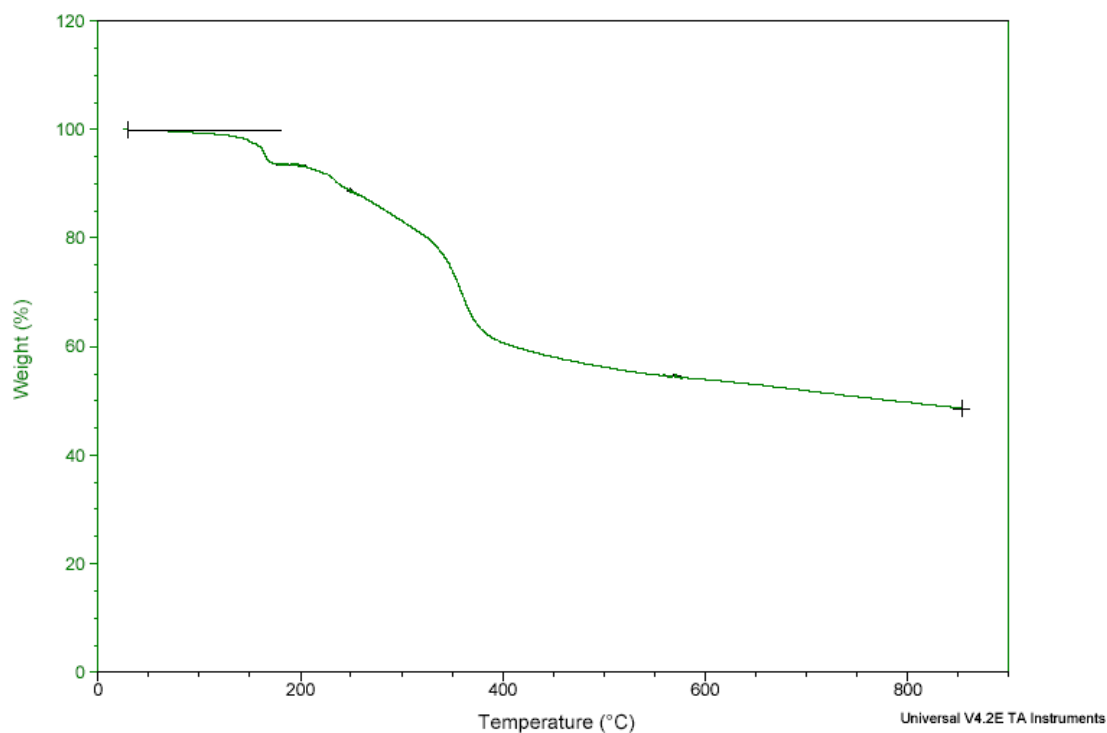

Figure S1. TGA curve for complex 2.

Sample: 08-6-5-3  
Size: 12.5280 mg  
Method: custom

DSC-TGA

File: C:\TA\Data\SDT\zhulg1090322-2.001  
Operator: CHEN LINSHEN  
Run Date: 22-Mar-2009 12:06  
Instrument: SDT Q600 V8.2 Build 100

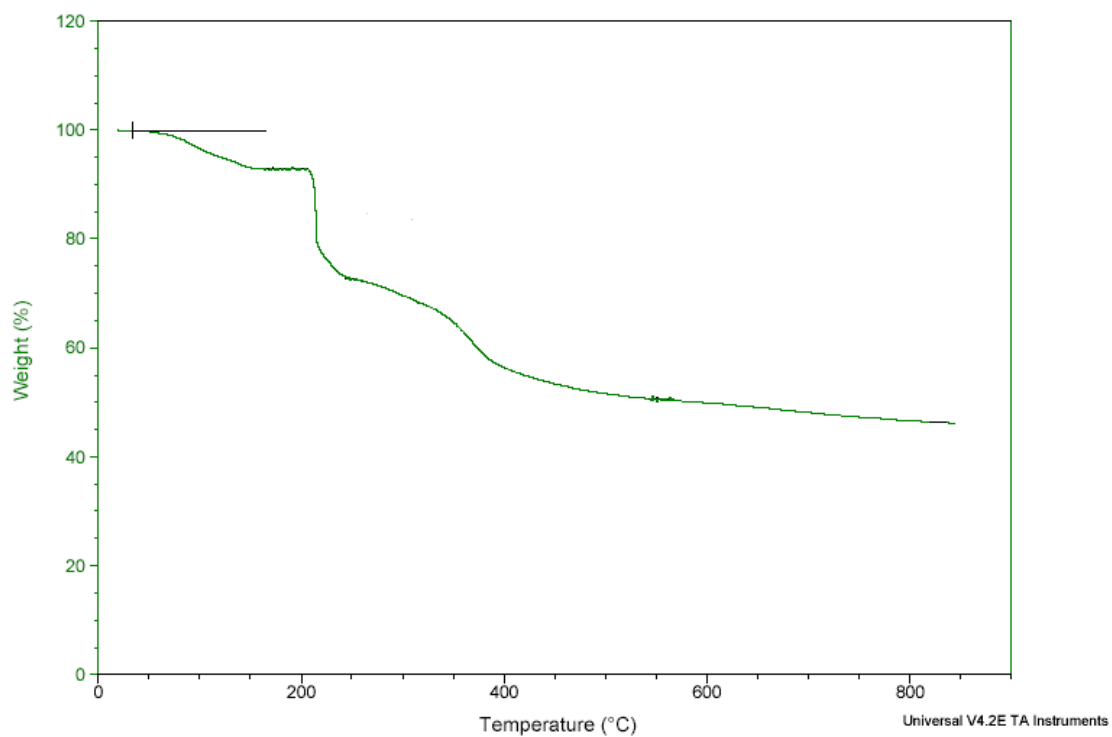

Figure S2. TGA curve of complex 3.
